# Supplementary material for: Patient survival and tumor characteristics associated with CHEK2:p.I157T – findings from the Breast Cancer Association Consortium
Source: Springer Nature journal article supplement (doi:10.1186/s13058-016-0758-5), 2016-10-03

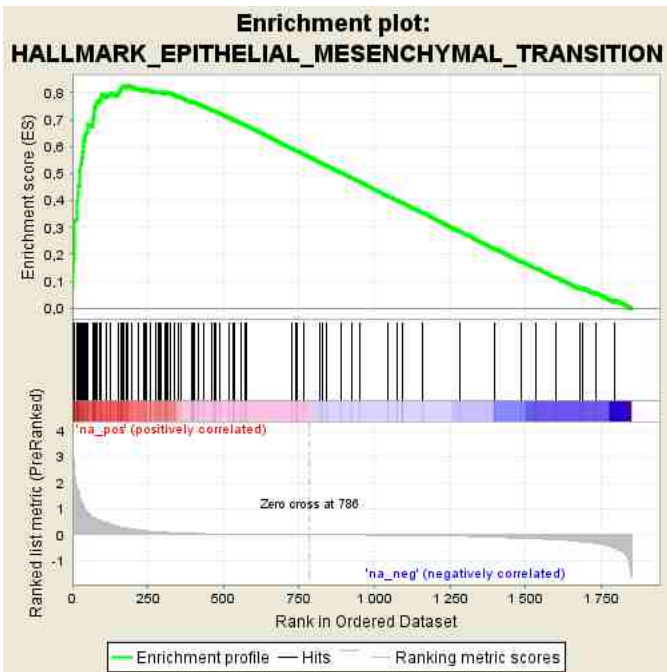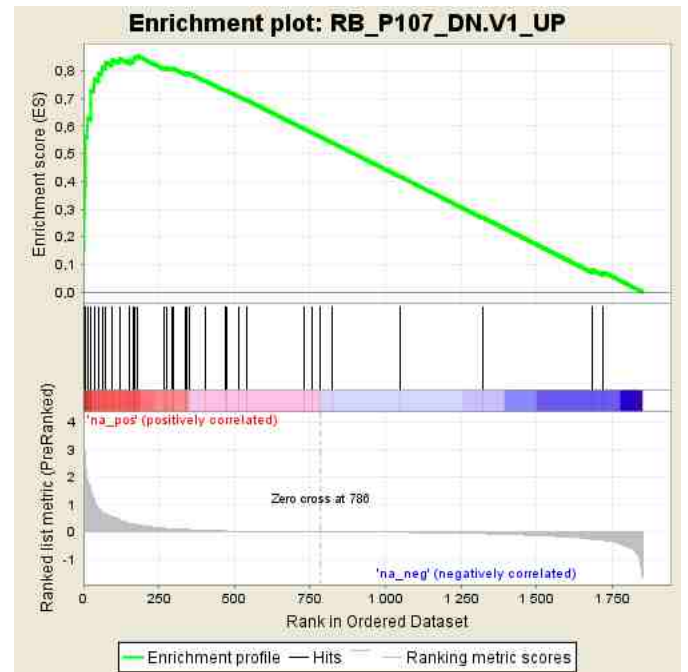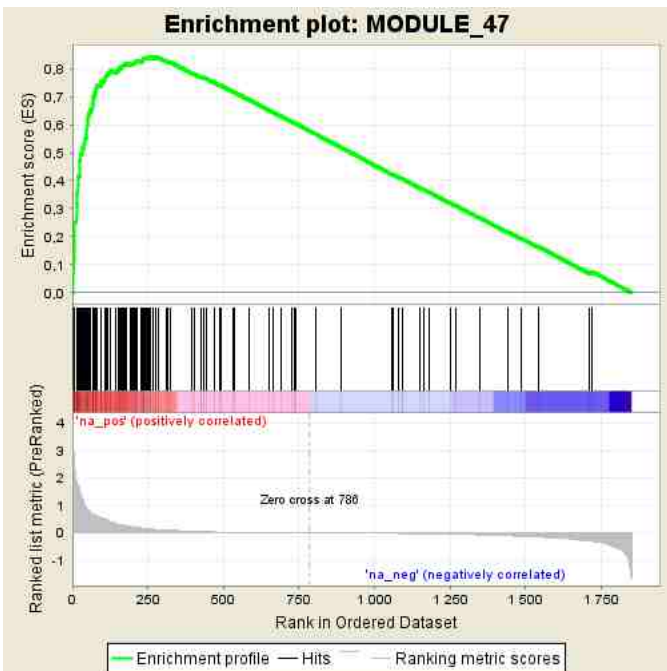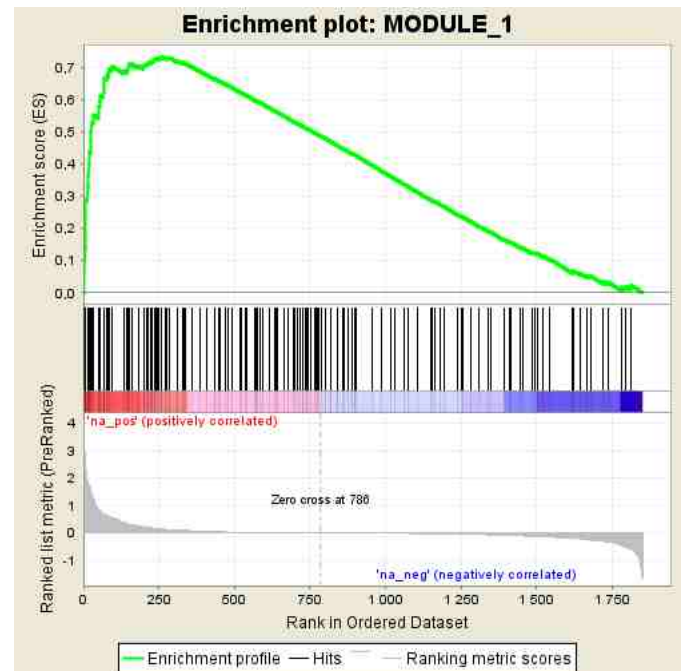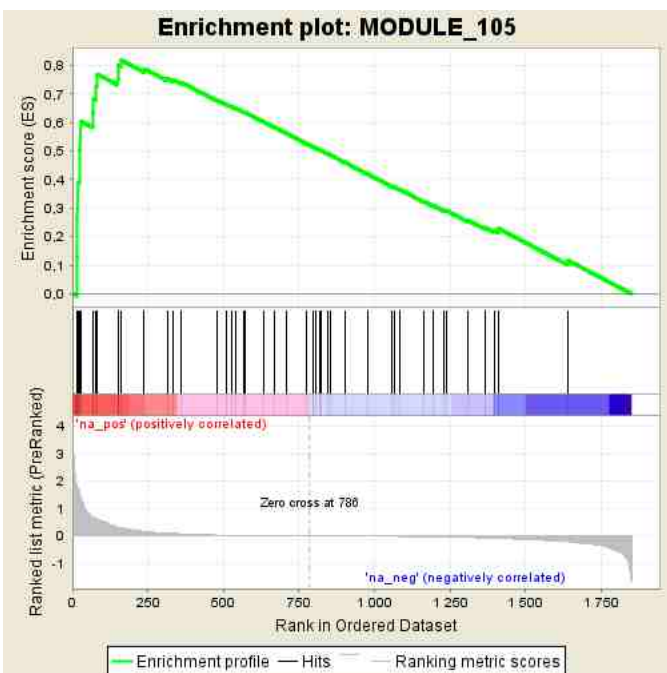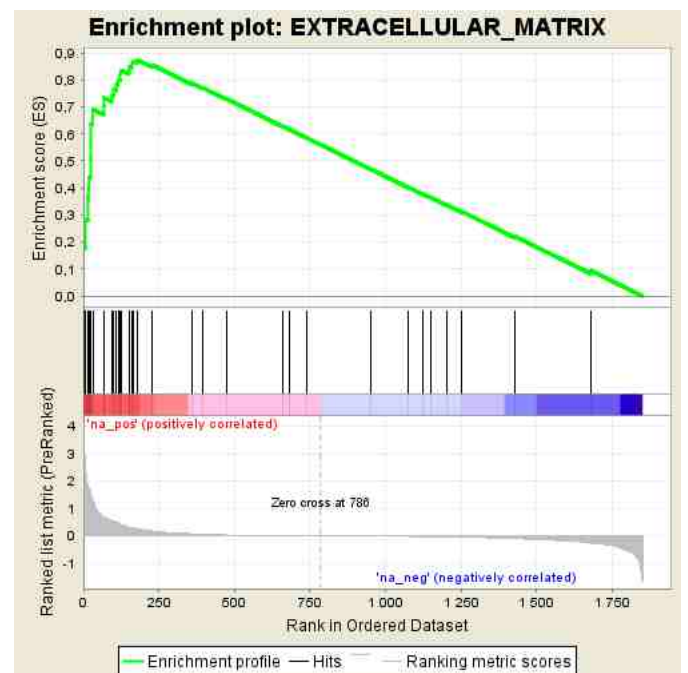

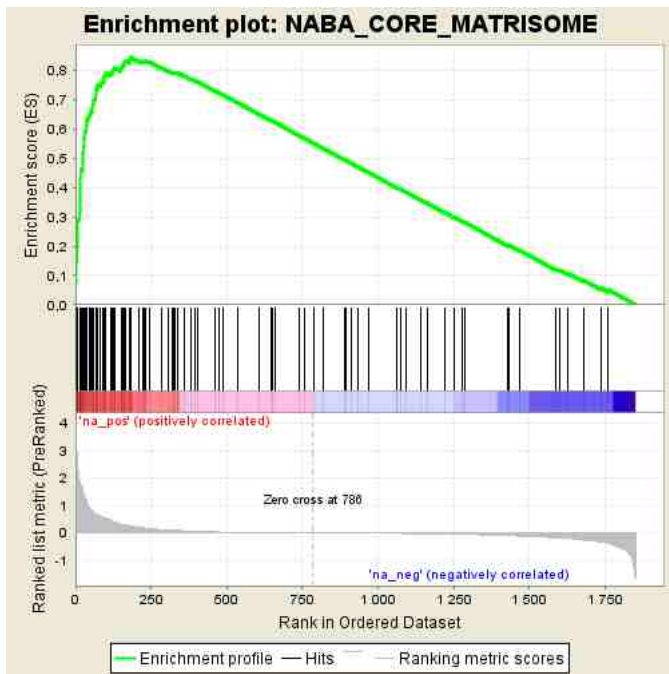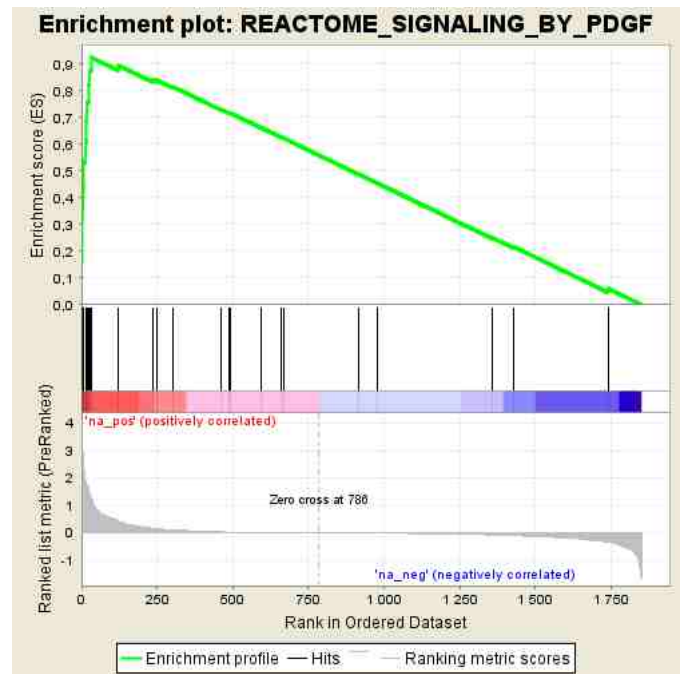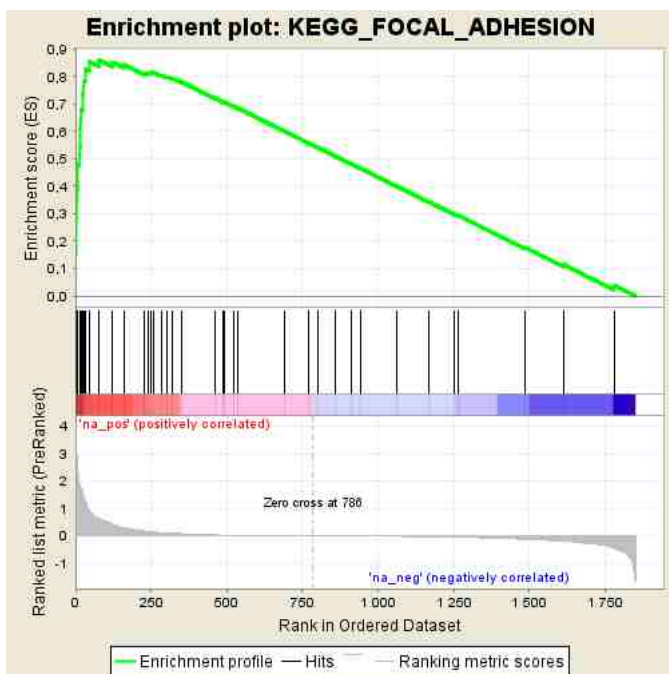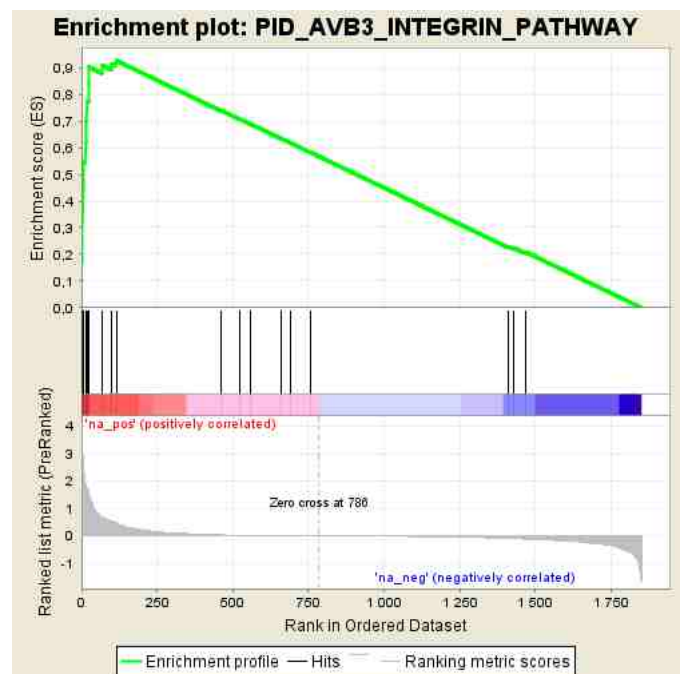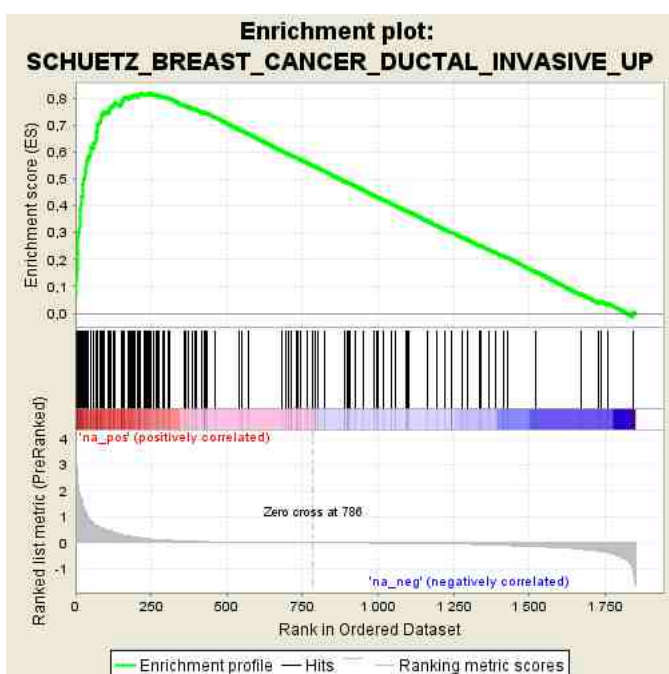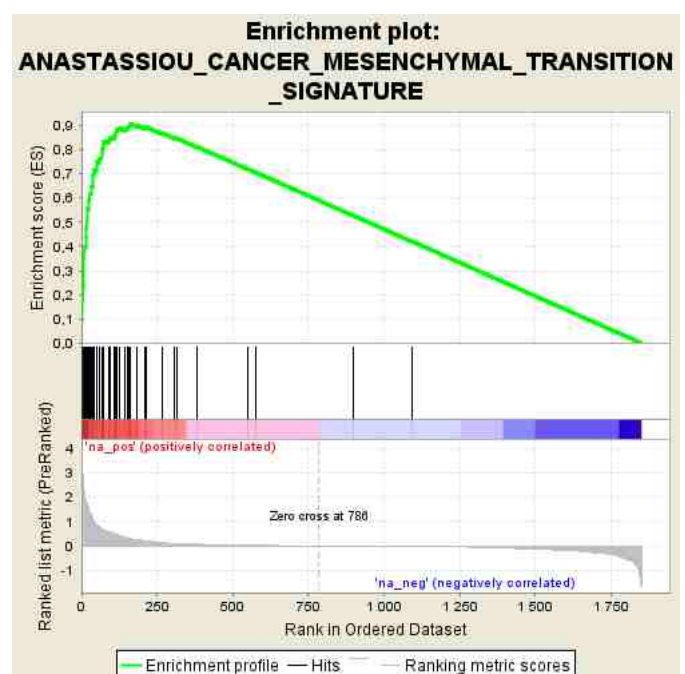

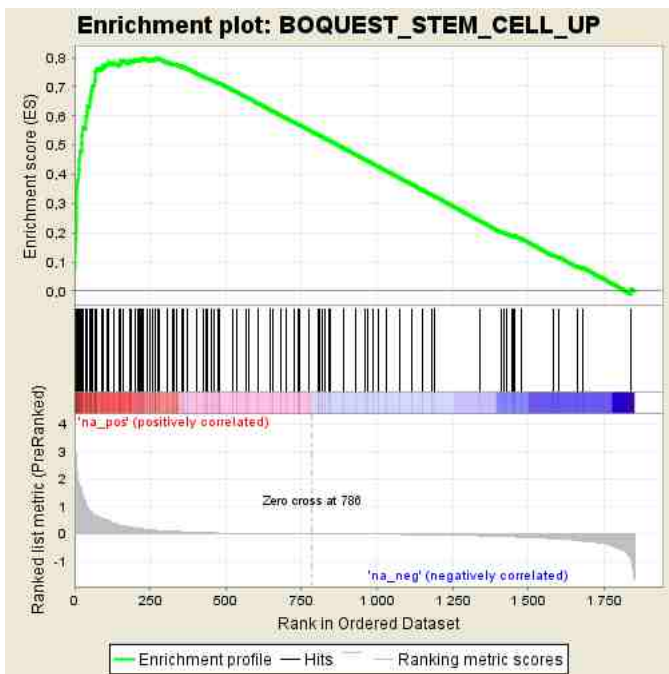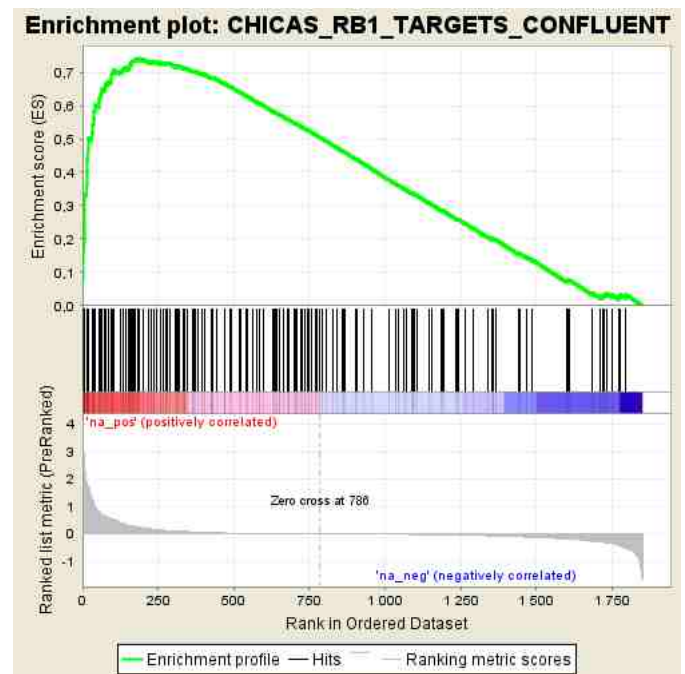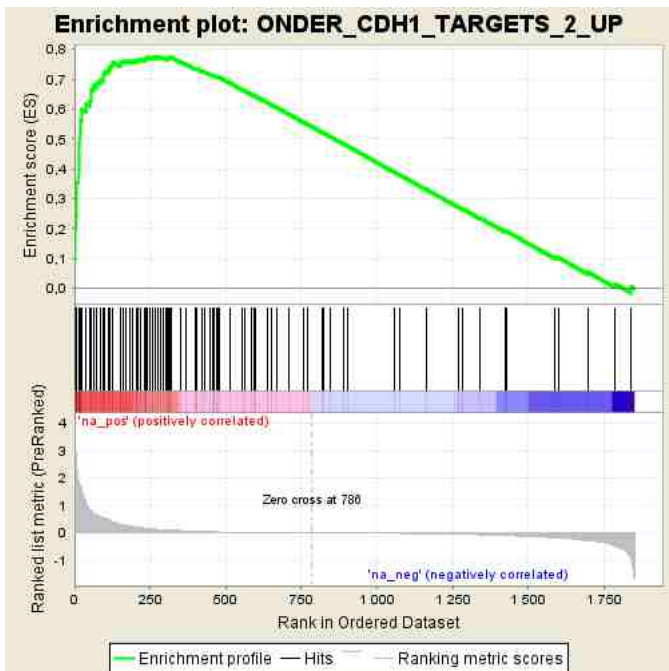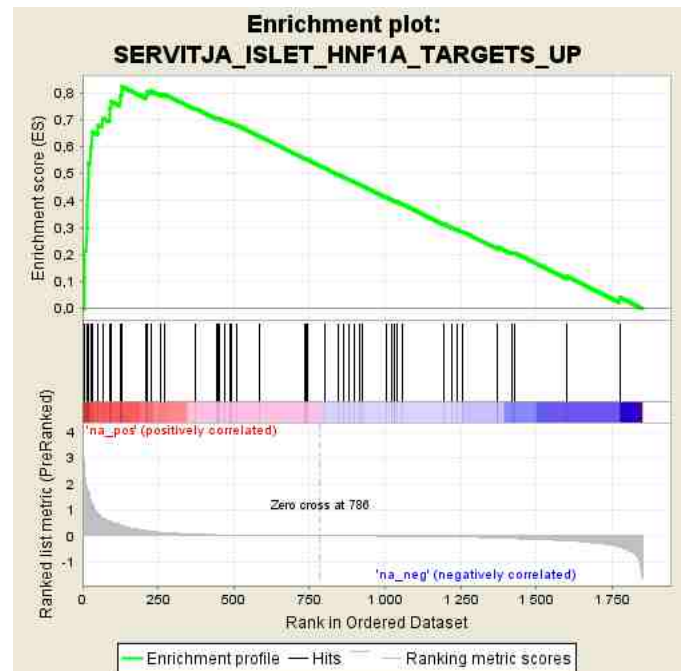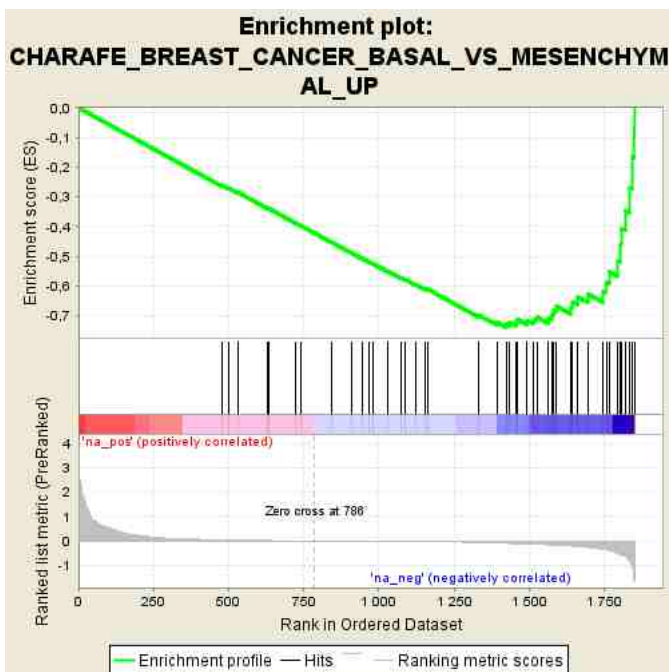

Supplement: MOESM2 [file 13058_2016_758_MOESM2_ESM.pdf]
